# Supplementary material for: MMP2-A2M interaction increases ECM accumulation in aged rat kidney and its modulation by calorie restriction
Source: PubMed Central journal article supplement (PMC5814160; doi:10.18632/oncotarget.23652), 2017-12-24
Supplement: oncotarget-09-5588-s001.pdf [file oncotarget-09-5588-s001.pdf]

# MMP2-A2M interaction increases ECM accumulation in aged rat kidney and its modulation by calorie restriction

## SUPPLEMENTARY MATERIALS

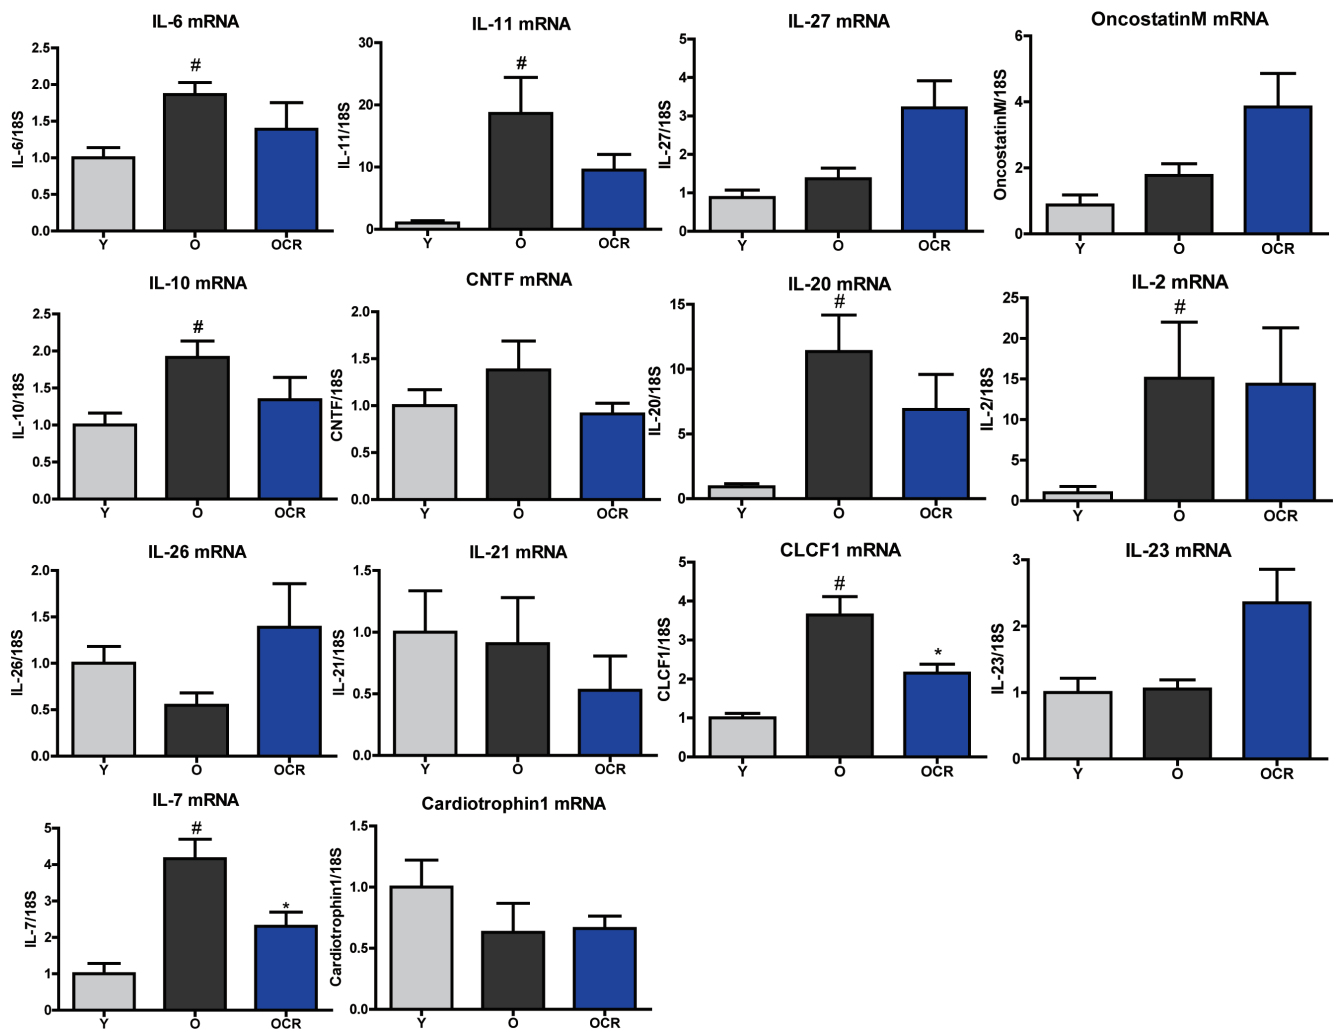

Supplementary Figure 1: Screening of STAT-3 activating cytokines in kidney

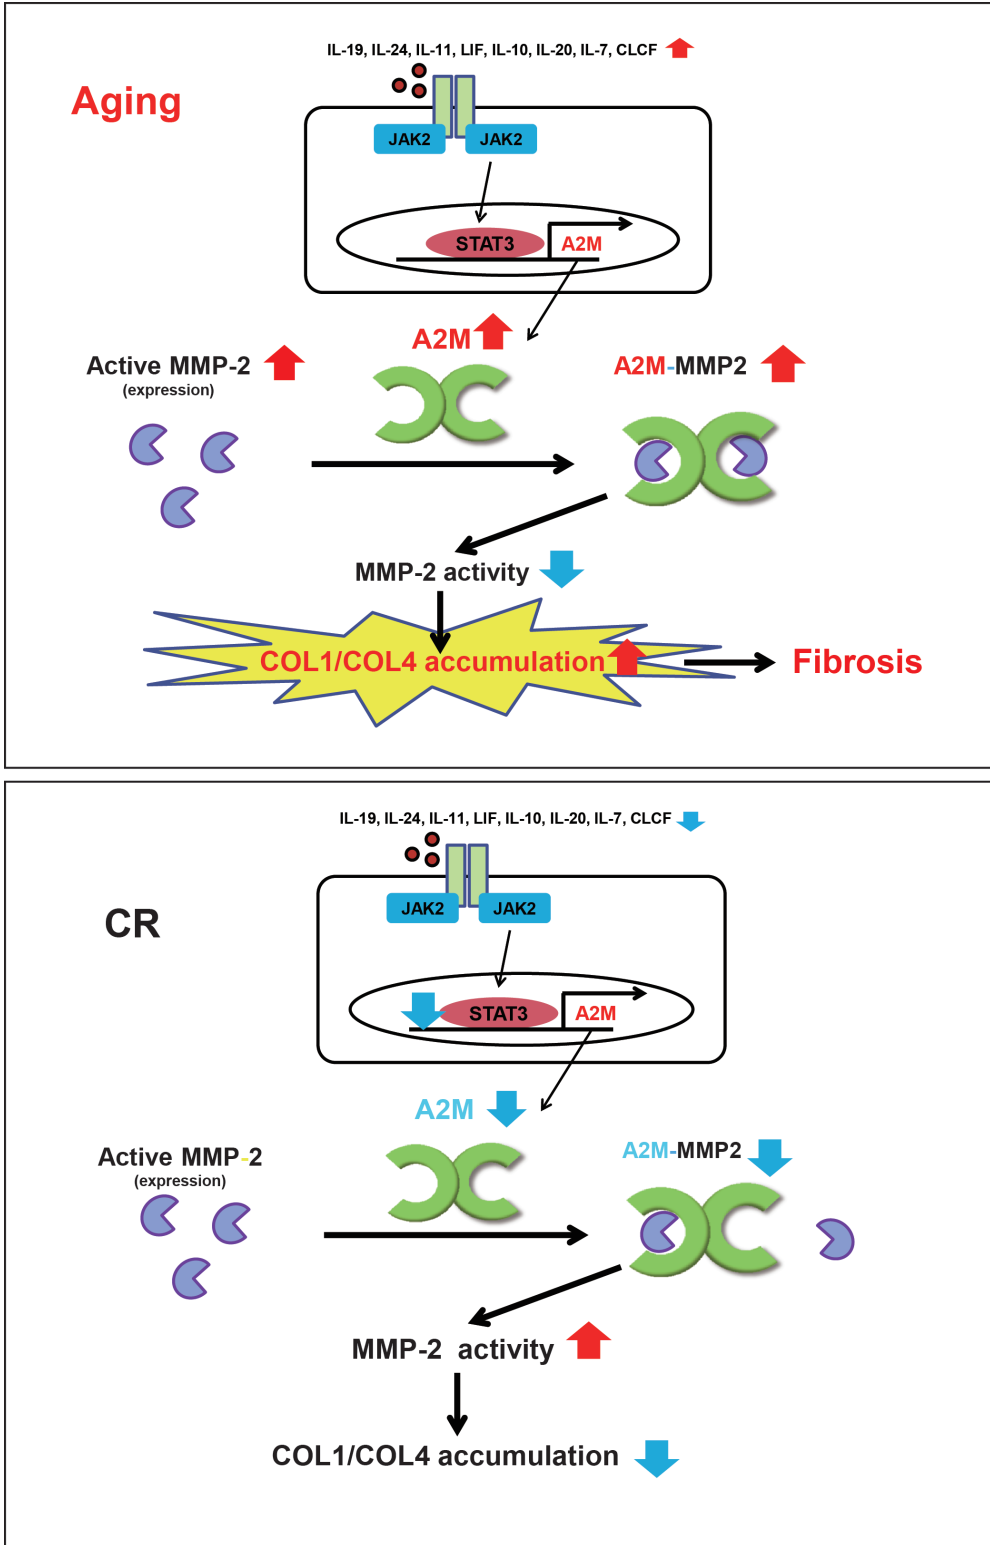

Supplementary Figure 2: Graphical abstract

**Supplementary Table 1: Primary antibodies used in experiments**

| Antibody         | Host animal | Dilution | Company                  |
|------------------|-------------|----------|--------------------------|
| MMP-2            | Mouse       | 1:1000   | Santa Cruz (sc-13594)    |
| COL1             | Mouse       | 1:1000   | Santa Cruz (sc-80760)    |
| COL4A1/3         | Goat        | 1:1000   | Santa Cruz (sc-9301)     |
| A2M              | Rabbit      | 1:1000   | Proteintech (13545-1-AP) |
| $\beta$ -actin   | Mouse       | 1:2000   | Santa Cruz (sc-47778)    |
| TF-IIB           | Rabbit      | 1:1000   | Santa Cruz (sc-225)      |
| p-STAT3 (Tyr705) | Rabbit      | 1:1000   | Cell Signaling (#9131)   |

**Supplementary Table 2: Primer sequences for qPCR**

| Gene                  | Forward (5'-3')               | Reverse (3'-5')               |
|-----------------------|-------------------------------|-------------------------------|
| <i>MMP2</i>           | TGT CTC CCC CAA AAC AGA CA    | CAT CTG GGT TGC CAC ATC TT    |
| <i>A2M</i>            | AAA GTC TGC GAA CGG CTC AG    | CAC TTC AGC CAC TCC TGC TG    |
| <i>IL-6</i>           | TCA TTC TGT CTC GAG CCC AC    | GAA GTA GGG AAG GCA GTG GC    |
| <i>IL-11</i>          | TAG CAA ACG GAC CGAAAC AC     | TGC GTG ACT TT GCT GAAAC      |
| <i>LIF</i>            | AAA AAC CTC AAC CCC ACT GC    | TTG TTG CAC AGA CGG CAA AG    |
| <i>OncostatinM</i>    | TCC TGT TCC TGA GCA TGT CAT G | AGC GTG TTC AGG TTT TGG TG    |
| <i>CNTF</i>           | ACA GAA GCA AAC CAG CTC AC    | AGG TGT TTG CTC TGC GAA AG    |
| <i>IL-27</i>          | TTT GCT GAA TCT CGC TTG CC    | TCA GGG AAA CAT TGG GGA GAT G |
| <i>IL-10</i>          | AAG ACC AGC AAA GG CAT TC     | TAT GTT GTC CAG CTG GTC CTT C |
| <i>IL-19</i>          | ACA GCT GCC TTC CAT CGT TG    | GAG GCG CAT GTC CAC AGA AA    |
| <i>IL-20</i>          | TTG TGG CGA AGA AGC AAT GG    | AGA ATG CCT AGT TCC CCC AAA G |
| <i>IL-22</i>          | TCA ACC GCA CCT TTA TGC TG    | TCA AGG GTG AAG TTG AG AC     |
| <i>IL-24</i>          | GGA CAA TGC CAT GCT TCC CA    | GGC ACGGAG AA AAA GGA GG      |
| <i>IL-26</i>          | TTG CCA TTG CCA AGC ACA AG    | ATC GTT GCT TTG AGC CAT GC    |
| <i>IL-2</i>           | TGC AGC GTG TGT TGG ATT TG    | TGG CTC ATC ATC GAA TTG GC    |
| <i>IL-7</i>           | AAT TCC TCC CCT GAT CCT TGT G | CAA AGG CTT TAC CGT CCT TGT C |
| <i>Cardiotrophin1</i> | ACA GAC ACA CAA CCT TGC AC    | GTT GCT GCA CAT ATT CCT CCA G |
| <i>CLCF1</i>          | TGC TTT CTG CTT GCC ACT TG    | AAA GGC ACA TGC TAC AGT GGF   |
| <i>IL-21</i>          | CCA TAA ATC AAG CCC CCA AAG G | TGC TCA CAT TGC CCC TTT AC    |
| <i>IL-23</i>          | CAG TGT GGT GAT GGT TGT GAT C | TTG GCG GAT CCT TTG CAAAC     |
| <i>GAPDH</i>          | TGC TGG TGC TGA GTA TGT CG    | AGT TGG TGG TGC AGG ATG C     |
| <i>18S</i>            | GAC AAC AAG CTG CGT GAG GA    | GTG GTC TTG GTG TGC TGA CC    |
